# Supplementary material for: RyhB Paralogs Downregulate the Expressions of Multiple Survival-Associated Genes and Attenuate the Survival of Salmonella Enteritidis in the Chicken Macrophage HD11
Source: MDPI journal article supplement (doi:10.3390/microorganisms11010214), 2023-01-15
Supplement: s1 [file s1]

## Supplementary Materials

**Table S1.** Primers of genes used for qRT-PCR.

| Primer name      | Sequence (5'–3')          |
|------------------|---------------------------|
| <i>ryhB</i> -1-F | AAAAAGAAGTAGACAAGTGCGAATG |
| <i>ryhB</i> -1-R | AGCAATGTGAGCAATGTCGTG     |
| <i>ryhB</i> -2-F | GCGGCTGAAAAAGACCATGA      |
| <i>ryhB</i> -2-R | CCTGTTCGGTACGACATTGCT     |
| <i>ssaI</i> -F   | AACCGAGCCAGGAGCAAATTA     |
| <i>ssaI</i> -R   | TTATTAAGCGCTTGCGATGCT     |
| <i>sseA</i> -F   | GGCAGAGAGCCCCAAAAAGA      |
| <i>sseA</i> -R   | CCGGGGCTTGAGCATTAAGT      |
| <i>pagC</i> -F   | TATCCGAGGGGTAAATGTGA      |
| <i>pagC</i> -R   | CAGCGCGTATAACGAAAAAT      |
| <i>sodC</i> -F   | GTAGAGATGAATCTGGTGACG     |
| <i>sodC</i> -R   | TTCATGCTTGCCGGTATTT       |
| <i>mgtC</i> -F   | TGTCTCTGGTATTGGCTTTC      |
| <i>mgtC</i> -R   | CGGGAGTTGATTTATACGCT      |
| <i>yaeB</i> -F   | GAAATTAGGCAGTCTGGATCT     |
| <i>yaeB</i> -R   | CGTTAAAATCATGCAGCCAG      |
| <i>pocR</i> -F   | GCCTCACATGTCTATCTCAG      |
| <i>pocR</i> -R   | AGACTTTGCAAAAATAGCTGG     |
| <i>hns</i> -F    | TTCTGAACAACATCCGTACT      |
| <i>hns</i> -R    | CTATTCAGCAGTTCATTCGG      |
| <i>arcC</i> -Fwd | ATTGCTGGCGGAGCAGATAG      |
| <i>arcC</i> -Rev | CCGCTTCACATACCCGCTTA      |
| <i>nark</i> -Fwd | GGTATCCTCATCGTGCCCTG      |
| <i>nark</i> -Rev | TATTGCCCAGACCACCGTTC      |
| <i>nirB</i> -Fwd | ATCATCGCCACGGAGAAAGG      |
| <i>nirB</i> -Rev | GGGTCAGTTTGTGCGGCAGTA     |
| <i>nirD</i> -Fwd | CGCGATTTTCCGTCCTTACC      |
| <i>nirD</i> -Rev | CGCAATCAGTCCACGAGACA      |
| <i>narG</i> -Fwd | ACCAACGTTACGAGCTGAT       |
| <i>narG</i> -Rev | AGGAAGTTGAGCGCCTTCTC      |
| <i>sipA</i> -Fwd | AGGCGAAGACGCTACTGATG      |
| <i>sipA</i> -Rev | GCTTCGCTTCCGCTTTCTTT      |
| <i>sopE</i> -Fwd | AGGTAGCGCGAGTAAAGACC      |
| <i>sopE</i> -Rev | CGTCATTCTTGTTGCTCCG       |
| <i>tolQ</i> -Fwd | CGGGTATTGCCGAAGCATTG      |
| <i>tolQ</i> -Rev | TACCCCTTGTTGCTTTTCGCT     |
| <i>hscA</i> -Fwd | CGCTATCCGCATCTGCCTTA      |
| <i>hscA</i> -Rev | CGAAATAGGCGGGAACGGTA      |
| <i>nrdB</i> -Fwd | TCTGCTGGCGTTACTGGTTT      |
| <i>nrdB</i> -Rev | CATCACCACCATGACCACCA      |

**Table S2.** Primers for construction of recombinant plasmids.

| Primer name               | Sequence (5'-3')                             |
|---------------------------|----------------------------------------------|
| <i>ssaI</i> -pXG-10SF-Fwd | GAGATACTGAGCACATGCATAATATTCTGATATGAGCGTAGTGC |
| <i>ssaI</i> -pXG-10SF-Rev | AGCCAGCGGATCCGCTAGCTGCCATGTTATCCAGCTT        |
| <i>sseA</i> -pXG-10SF-Fwd | GAGATACTGAGCACATGCATTTTCATCCCTGGCCTTAACG     |
| <i>sseA</i> -pXG-10SF-Rev | AGCCAGCGGATCCGCTAGCCCTTTTGTTCCTGACGG         |
| pXG-10SF-seq-Fwd          | CGCCAGATATCGACGTCT                           |
| pXG-10SF-seq-Rev          | AAAGACAGGCACCTCTCC                           |

**Table S3.** Summary about total reads successfully aligned to reference genome.

| Sample name                                       | Total reads | Successfully aligned reads | Ratio |
|---------------------------------------------------|-------------|----------------------------|-------|
| WT1                                               | 4474322     | 4305857                    | 96%   |
| WT2                                               | 5471969     | 5207970                    | 95%   |
| WT3                                               | 5579891     | 5293677                    | 95%   |
| $\Delta$ <i>ryhB</i> -1-1                         | 5476167     | 5256237                    | 96%   |
| $\Delta$ <i>ryhB</i> -1-2                         | 5814310     | 5544776                    | 95%   |
| $\Delta$ <i>ryhB</i> -1-3                         | 5756354     | 5526504                    | 96%   |
| $\Delta$ <i>ryhB</i> -2-1                         | 5969797     | 5712121                    | 96%   |
| $\Delta$ <i>ryhB</i> -2-2                         | 6090677     | 5817934                    | 96%   |
| $\Delta$ <i>ryhB</i> -2-3                         | 5725666     | 57554                      | 96%   |
| $\Delta$ <i>ryhB</i> -1 $\Delta$ <i>ryhB</i> -2-1 | 5767623     | 5505745                    | 95%   |
| $\Delta$ <i>ryhB</i> -1 $\Delta$ <i>ryhB</i> -2-2 | 6323152     | 6000992                    | 95%   |
| $\Delta$ <i>ryhB</i> -1 $\Delta$ <i>ryhB</i> -2-3 | 6007256     | 5713601                    | 95%   |

**Table S4.** Information of 13 candidate target genes screened by RNA-Seq.

| Gene name   | Product                                                | $\log_2(\text{FC})$            |                                |                                                         |
|-------------|--------------------------------------------------------|--------------------------------|--------------------------------|---------------------------------------------------------|
|             |                                                        | WT vs. $\Delta$ <i>ryhB</i> -1 | WT vs. $\Delta$ <i>ryhB</i> -2 | WT vs. $\Delta$ <i>ryhB</i> -1/ $\Delta$ <i>ryhB</i> -2 |
| <i>sipA</i> | pathogenicity island 1 effector protein                | -1.043961057                   | -0.449383288                   | -0.492440637                                            |
| <i>sopE</i> | guanine nucleotide exchange factor SopE                | -1.30455987                    | NS                             | -1.284453795                                            |
| <i>hns</i>  | global DNA-binding transcriptional dual regulator H-NS | 1.314465854                    | 1.825069442                    | 1.278914736                                             |
| <i>ssaI</i> | pathogenicity island protein                           | 2.40329259                     | 1.563195229                    | 1.749635333                                             |
| <i>sseA</i> | pathogenicity island protein                           | 1.749390717                    | 1.269857594                    | 1.708645919                                             |
| <i>arcC</i> | carbamate kinase                                       | NS                             | NS                             | -1.280819577                                            |
| <i>narK</i> | NarK family nitrate/nitrite MFS transporter            | -1.372546441                   | -1.255806586                   | -1.62991254                                             |
| <i>nirB</i> | nitrite reductase large subunit                        | -1.269562961                   | -1.118081493                   | -1.325694806                                            |
| <i>nirD</i> | nitrite reductase small subunit NirD                   | NS                             | NS                             | -1.268219173                                            |
| <i>narG</i> | carbamate kinase                                       | NS                             | NS                             | -1.204395098                                            |
| <i>tolQ</i> | colicin uptake protein TolQ                            | 0.355563326                    | 0.33111866                     | 0.541312818                                             |
| <i>hscA</i> | chaperone protein HscA                                 | 0.498653077                    | 0.712040375                    | 0.614042734                                             |
| <i>mrdB</i> | cell wall shape-determining protein                    | 0.664299108                    | 0.765219803                    | 0.466340675                                             |

WT: wild-type; NS: not significant.

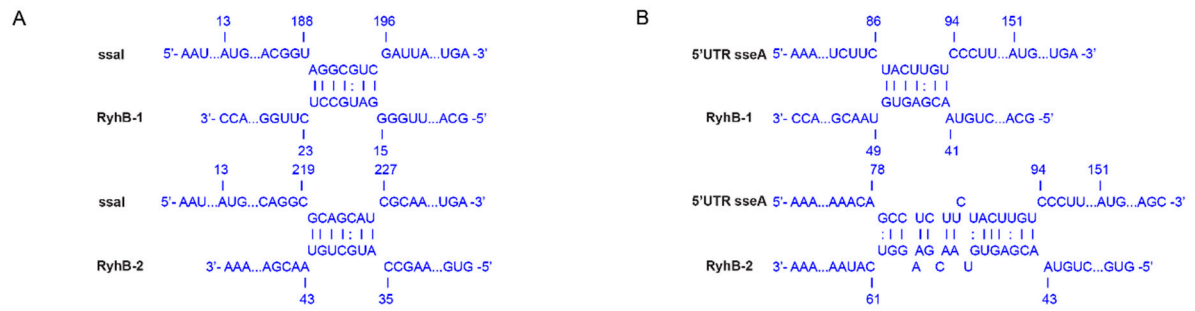

**Figure S1.** Interaction site prediction between RyhB-1/RyhB-2 and putative target genes. **(A)** Prediction between RyhB-1/RyhB-2 and *ssal*. CDS region of *ssal* is predicted to form base pairs with RyhB-1 and RyhB-2. **(B)** Prediction between RyhB-1/RyhB-2 and *sseA*. 5' UTR of *ssal* is predicted to form base pairs with RyhB-1 and RyhB-2.
